# Supplementary material
Source: PubMed Central journal article supplement (PMC357077)

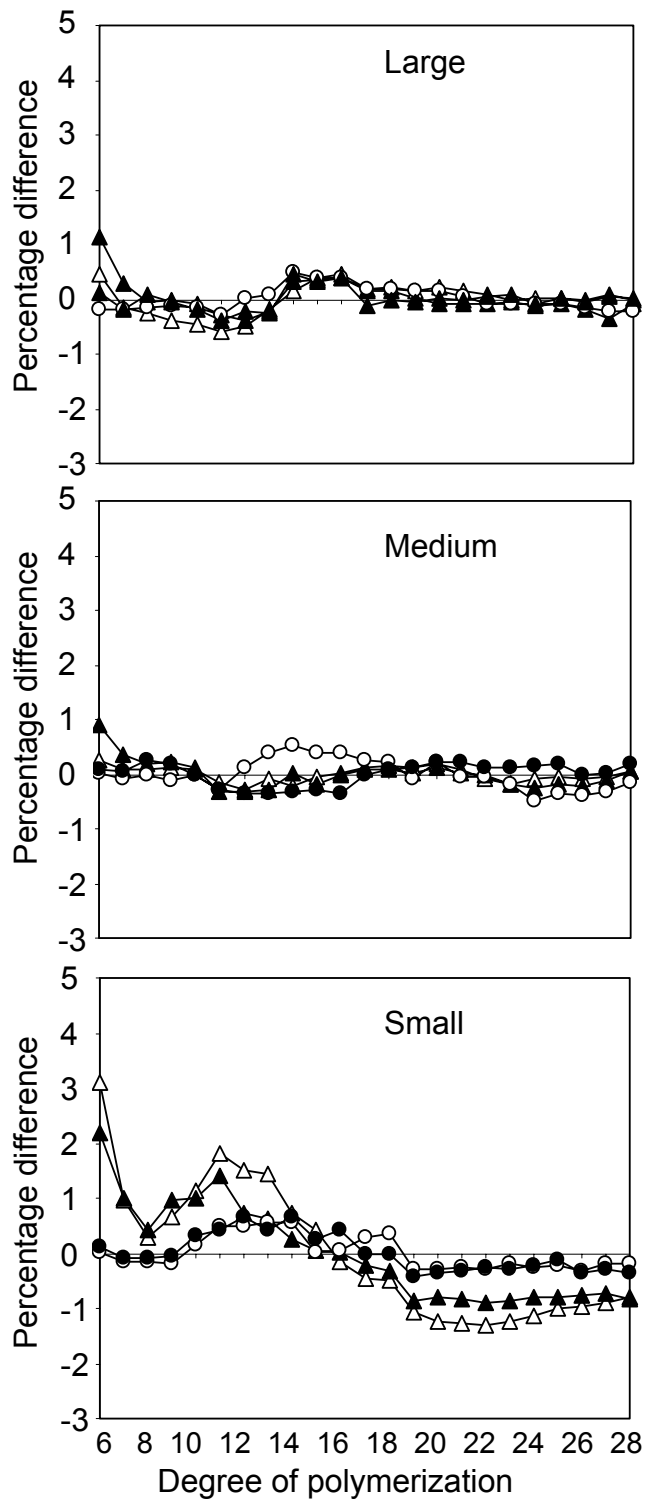

Supplement: pnas_0305920101_4.pdf [file pnas_0305920101_4.pdf]
